# Supplementary material for: Origanum vulgare L. essential oil inhibits virulence patterns of Candida spp. and potentiates the effects of fluconazole and nystatin in vitro
Source: PubMed Central journal article supplement (PMC8827202; doi:10.1186/s12906-022-03518-z), 2022-02-09
Supplement: 12906_2022_3518_MOESM1_ESM.pdf [file 12906_2022_3518_MOESM1_ESM.pdf]

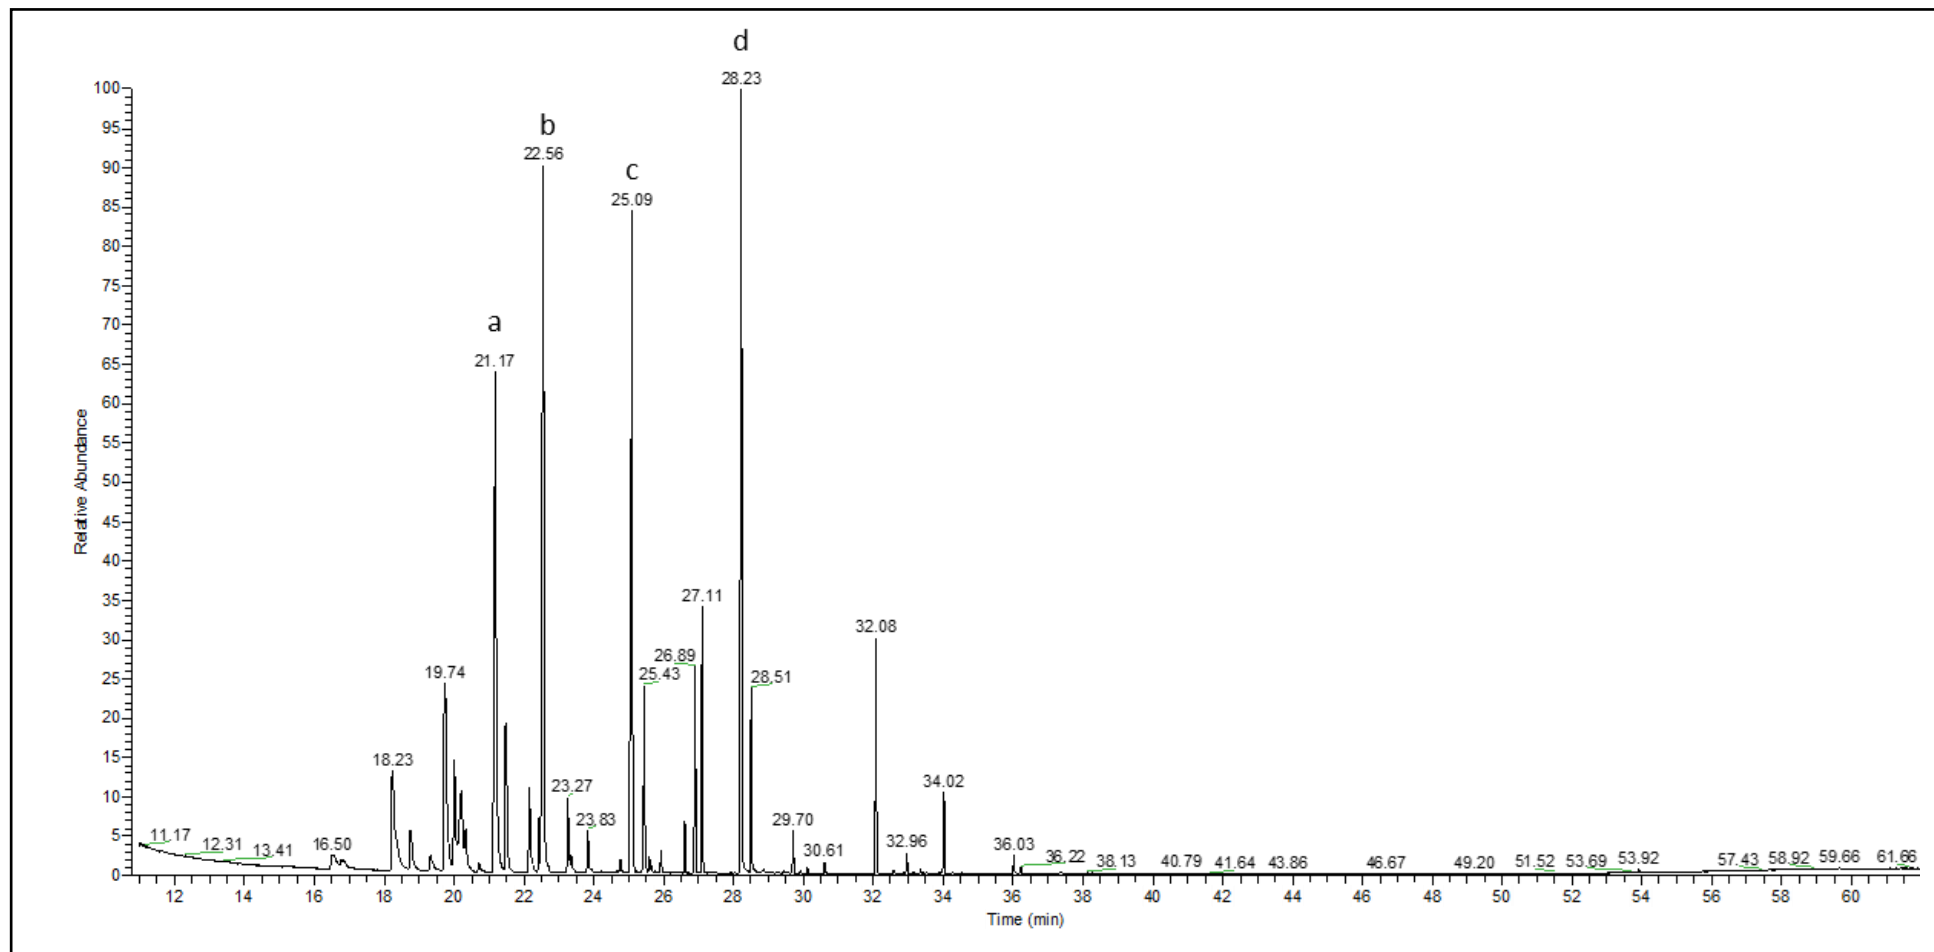

**Fig. S1** GC-MS chromatogram of essential oil of *O. vulgare*. Letter indicate the major constituents identified in the sample. a:  $\gamma$ -terpinene; b: *cis*-sabinene hydrate; c: 4-terpineol; d: thymol.
