# Supplementary material for: Origanum vulgare L. essential oil inhibits virulence patterns of Candida spp. and potentiates the effects of fluconazole and nystatin in vitro
Source: PubMed Central journal article supplement (PMC8827202; doi:10.1186/s12906-022-03518-z), 2022-02-09

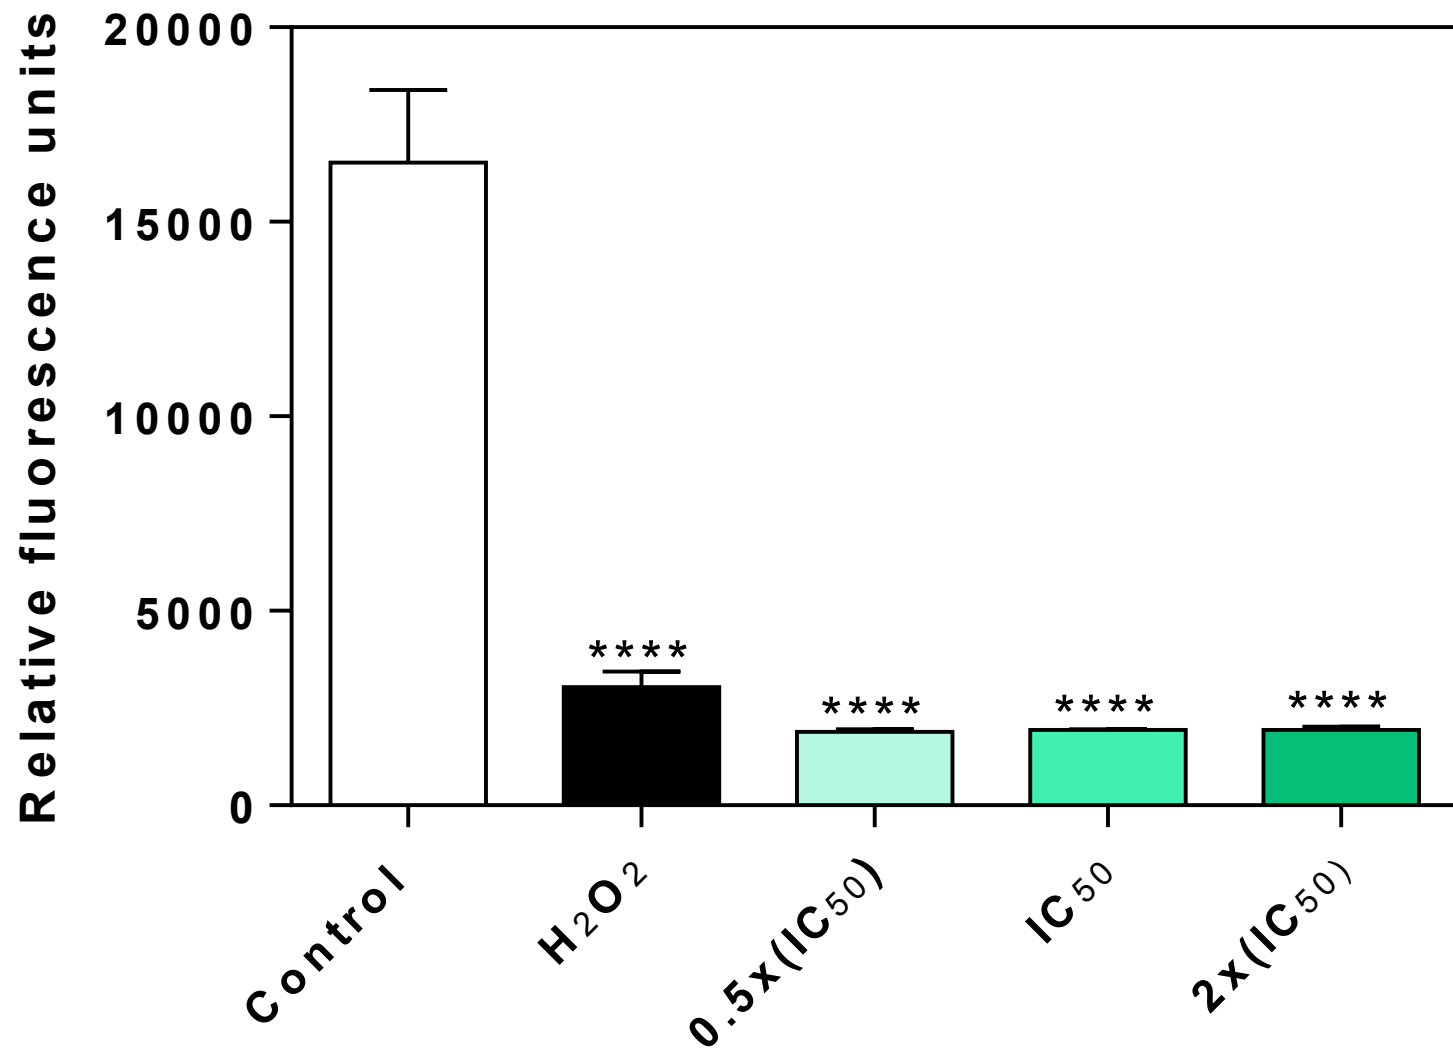

Supplement: 12906_2022_3518_MOESM3_ESM.pdf [file 12906_2022_3518_MOESM3_ESM.pdf]
